# Supplementary material for: Self-healing mechanisms of water triggered smart coating in seawater
Source: Royal Society of Chemistry journal article supplement (doi:10.1039/c3ta13389c), 2013-10-26
Supplement: c3ta13389c.pdf [file c3ta13389c.pdf]

Supporting Information for:

## Self-healing mechanism of water triggered smart coating in seawater

Wei Wang<sup>a,b,\*</sup>, Likun Xu<sup>a</sup>, Xiangbo Li<sup>a</sup>, Zhifeng Lin<sup>a</sup>, Yi Yang<sup>a,c</sup>, Enpeng An<sup>a,c</sup>

a State Key Laboratory for Marine Corrosion and Protection, Luoyang Ship Material Research Institute (LSMRI). 149-1 Zhuzhou Road, Laoshan District, Qingdao, 266101, PR China.

b College of Materials Science and Chemical Engineering, Harbin Engineering University, Harbin, 150001, PR China.

c State Key Laboratory of Advanced Technology for Materials Synthesis and Progressing, Wuhan University of Technology, Wuhan 430070, PR China.

### S1 Microcapsule preparation

IPDI microcapsules were synthesized via in situ polymerization procedure with slight modifications<sup>1</sup>. In a typical procedure, 60 ml water and 10 ml of 3.0 wt% aqueous solution of sodium dodecyl sulfate were mixed at room temperature. Under agitation (800 RPM), 5.00 g urea, 0.60 g ammonium chloride and 0.50 g resorcinol were successively dissolved in water. 8 ml IPDI was slowly added into the mixture to form an oil in water (O/W) emulsion. After stirred for 40 min, the pH value of the emulsion was slowly adjusted to 3.50 by drop-wise addition of sodium hydroxide and hydrochloric acid. One to two drops of 1-octanol were added to eliminate surface bubbles. Then, 12.00 g of a 37 wt% aqueous solution of formaldehyde was added. The temperature was raised to 60 °C at a rate of 1 °C min<sup>-1</sup>. After 2 h of continuous agitation the mixer and the polymerized microcapsules were obtained (Figure 1a), they were repeatedly washed with ethanol and water to remove impurities.

### S2 Plasma treatment

16% IPDI microcapsules were treated with oxygen plasma (radio frequency of 13.56 MHz) at a power of 100 W and a pressure of 250 mTorr for 4 min. Oxygen was introduced to the plasma chamber at a flow rate of 5 mL min<sup>-1</sup> for the pre-treatment procedure. The IPDI microcapsule surfaces, now modified by hydroxyl, carboxyl, and carbonyl groups, were easily dispersed into AVC.
